# Supplementary material for: Expansion of CRISPR Targeting Sites Using an Integrated Gene-Editing System in Apis mellifera
Source: MDPI journal article supplement (doi:10.3390/insects12100954), 2021-10-19
Supplement: s1 [file s1]

**Table S1** Information of primers used in this study

| Primers name              | Primer sequence (5' to 3')                                                 | Primer purpose                             |
|---------------------------|----------------------------------------------------------------------------|--------------------------------------------|
| Template-SpCas9 target1-F | TTAATACGACTCACTATAGGGGTAAGTGGATACAGGTACGATGTTTTAGAGCTAGAAATAG              | Amplifying transcription template of sgRNA |
| Template-SpCas9 target2-F | TTAATACGACTCACTATAGGGGCCAACATTGCCGTCGATTTGTTTTAGAGCTAGAAATAG               | Amplifying transcription template of sgRNA |
| Template-SpCas9 -R        | AGCACCGACTCGGTGCCACTTTTTCAAGTTGATAACGGACTAGCCTTATTTAACTTGCTATTTCTAGCTCTAAA | Amplifying transcription template of sgRNA |
| Template-SaCas9 target1-F | TAATACGACTCACTATAGATTAATAATTCCAAAGATACGTTTTAGTACTCTGGAAACAG                | Amplifying transcription template of sgRNA |
| Template-SaCas9 target2-F | TAATACGACTCACTATAGCAAATATTAATGAGACGAGATGTTTTAGTACTCTGGAAACAG               | Amplifying transcription template of sgRNA |
| Template-Cpf1 target12-F  | CCCTAATACGACTCACTATAGGTAATTTCTACTAAGTGTAGAT                                | Amplifying transcription template of CrRNA |
| Template-Cpf1 target1-R   | ACATCGCGTTTCAATTTATTATATCTACACTTAGTAGAAATTA                                | Amplifying transcription template of CrRNA |
| Template-Cpf1 target2-R   | TATATAGGGCAAAGAGTTAGCTTATCTACACTTAGTAGAAATTA                               | Amplifying transcription template of CrRNA |
| Mu-SpCas9 target1-F       | AGTTGGTTCGTTCTCGCTTGAATAATG                                                | Detecting mutations                        |
| Mu-SpCas9 target1-R       | TGTCTTCGGCCCTCAGTC                                                         | Detecting mutations                        |
| Mu-SpCas9 target2-F       | GAATGTAAGAAAGAACACCGAAC                                                    | Detecting mutations                        |
| Mu-SpCas9 target2-R       | CTGCTCCACGAGTAAACG                                                         | Detecting mutations                        |
| Mu-SaCas9 target1-F       | AGTTGGTTCGTTCTCGCTTGAATAATG                                                | Detecting mutations                        |
| Mu-SaCas9 target1-R       | ATCTGTTCTGCTCCACGAGTAAAC                                                   | Detecting mutations                        |
| Mu-SaCas9 target2-F       | CAGTTGGTTCGTTCTCGCTTGAATAATG                                               | Detecting mutations                        |
| Mu-SaCas9 target2-R       | CGCTGGTCAGGTCGAAGATGTTG                                                    | Detecting mutations                        |
| Mu- Cpf1 target1-F        | CAGTTGGTTCGTTCTCGCTTGAATAATG                                               | Detecting mutations                        |
| Mu- Cpf1 target1-R        | CGCTGGTCAGGTCGAAGATGTTG                                                    | Detecting mutations                        |
| Mu- Cpf1 target2-F        | CATCTCGGTGGTAGTCGCACTC                                                     | Detecting mutations                        |
| Mu- Cpf1 target2-R        | CGACGGCAATGTTGGCGATAAAC                                                    | Detecting mutations                        |

**Table S2** Frequency of CRISPR targeting sites in all honeybee 16 chromosomes

| chr.            | Length           | TTN      | NGG      | NNGRRT  | The integrated system |
|-----------------|------------------|----------|----------|---------|-----------------------|
| chr1            | 27754200         | 7111456  | 1703894  | 753122  | 9568472               |
| chr2            | 16093500         | 4091992  | 1031086  | 426048  | 5549126               |
| chr3            | 13619445         | 3613676  | 783131   | 369438  | 4766245               |
| chr4            | 13404451         | 3512073  | 810385   | 357949  | 4680407               |
| chr5            | 13920984         | 3616030  | 846742   | 376499  | 4839271               |
| chr6            | 17812983         | 4766166  | 977883   | 470703  | 6214752               |
| chr7            | 14262382         | 4052546  | 684171   | 363842  | 5100559               |
| chr8            | 12786769         | 3456449  | 719831   | 346378  | 4522658               |
| chr9            | 12729961         | 3512008  | 678441   | 334110  | 4524559               |
| chr10           | 12657134         | 3045754  | 773391   | 320922  | 4140067               |
| chr11           | 16444887         | 4551683  | 829267   | 415422  | 5796372               |
| chr12           | 11533137         | 3033628  | 693013   | 312725  | 4039366               |
| chr13           | 11279722         | 2872073  | 749752   | 306298  | 3928123               |
| chr14           | 10910039         | 2921990  | 649760   | 293352  | 3865102               |
| chr15           | 9922473          | 2691121  | 561361   | 260608  | 3513090               |
| chr16           | 7238532          | 1977500  | 386703   | 186865  | 2551068               |
| <b>Totality</b> | <b>222370599</b> | 58826145 | 12878811 | 5894281 | <b>77599237</b>       |

Numbers in purple and red represents the total length of chromosome and the total number of targeting sites, respectively.
